# Supplementary material
Source: PubMed Central journal article supplement (PMC5020360)
Supplement: aasm.39.10.1779s1.pdf [file aasm.39.10.1779s1.pdf]

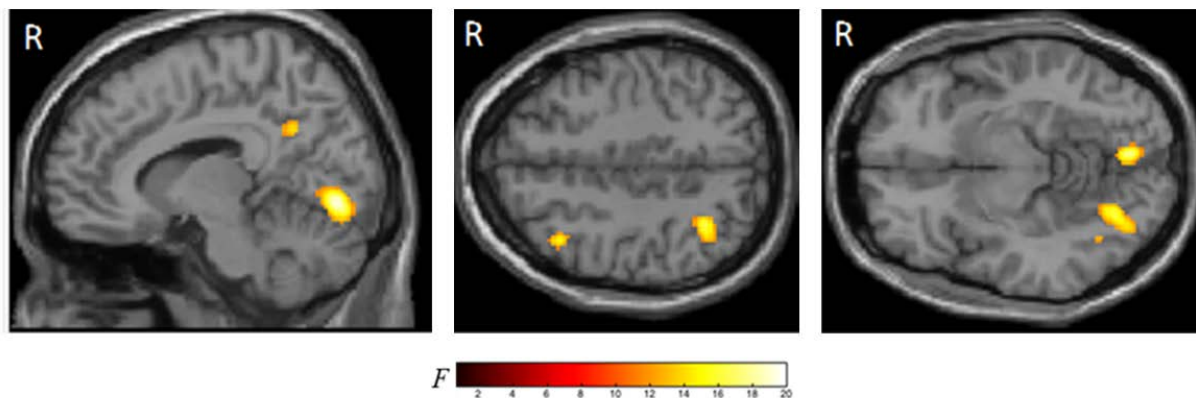

**Figure S1**—Regions of the brain showing a group (PI vs. GS) by state (wake vs. NREM sleep) interaction for relative regional cerebral metabolic rate for glucose (Figure 1 and Table 3) mapped onto a high-resolution MRI. The right hemisphere of the brain is indicated with R. The color bar represents  $F$  values.

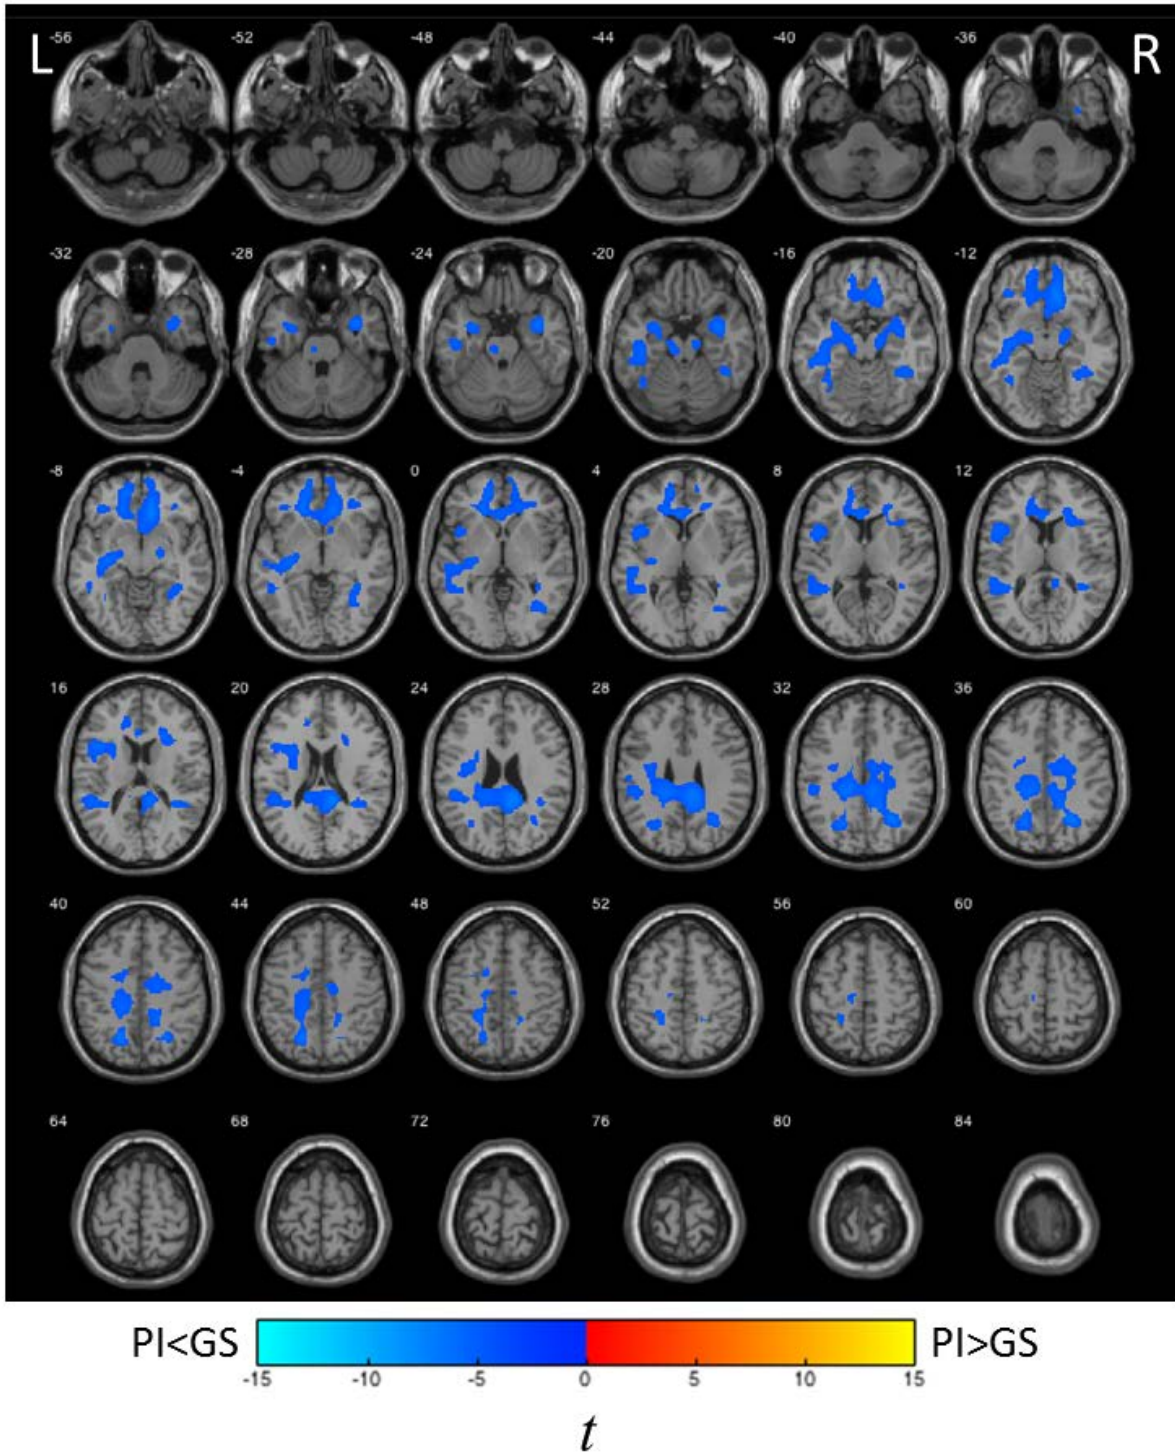

**Figure S2**—Results of the group (PI-GS), independent of sleep-wake state, analysis (Figure 2 and Table 4) for relative regional cerebral metabolic rate for glucose ( $rCMR_{glc}$ ) mapped onto a

high-resolution MRI. The left and right hemispheres of the brain are indicated with L and R, respectively. The color bar represents  $t$  values; blue indicates regions where PI had lower relative  $rCMR_{glc}$  than GS across wake and NREM sleep.

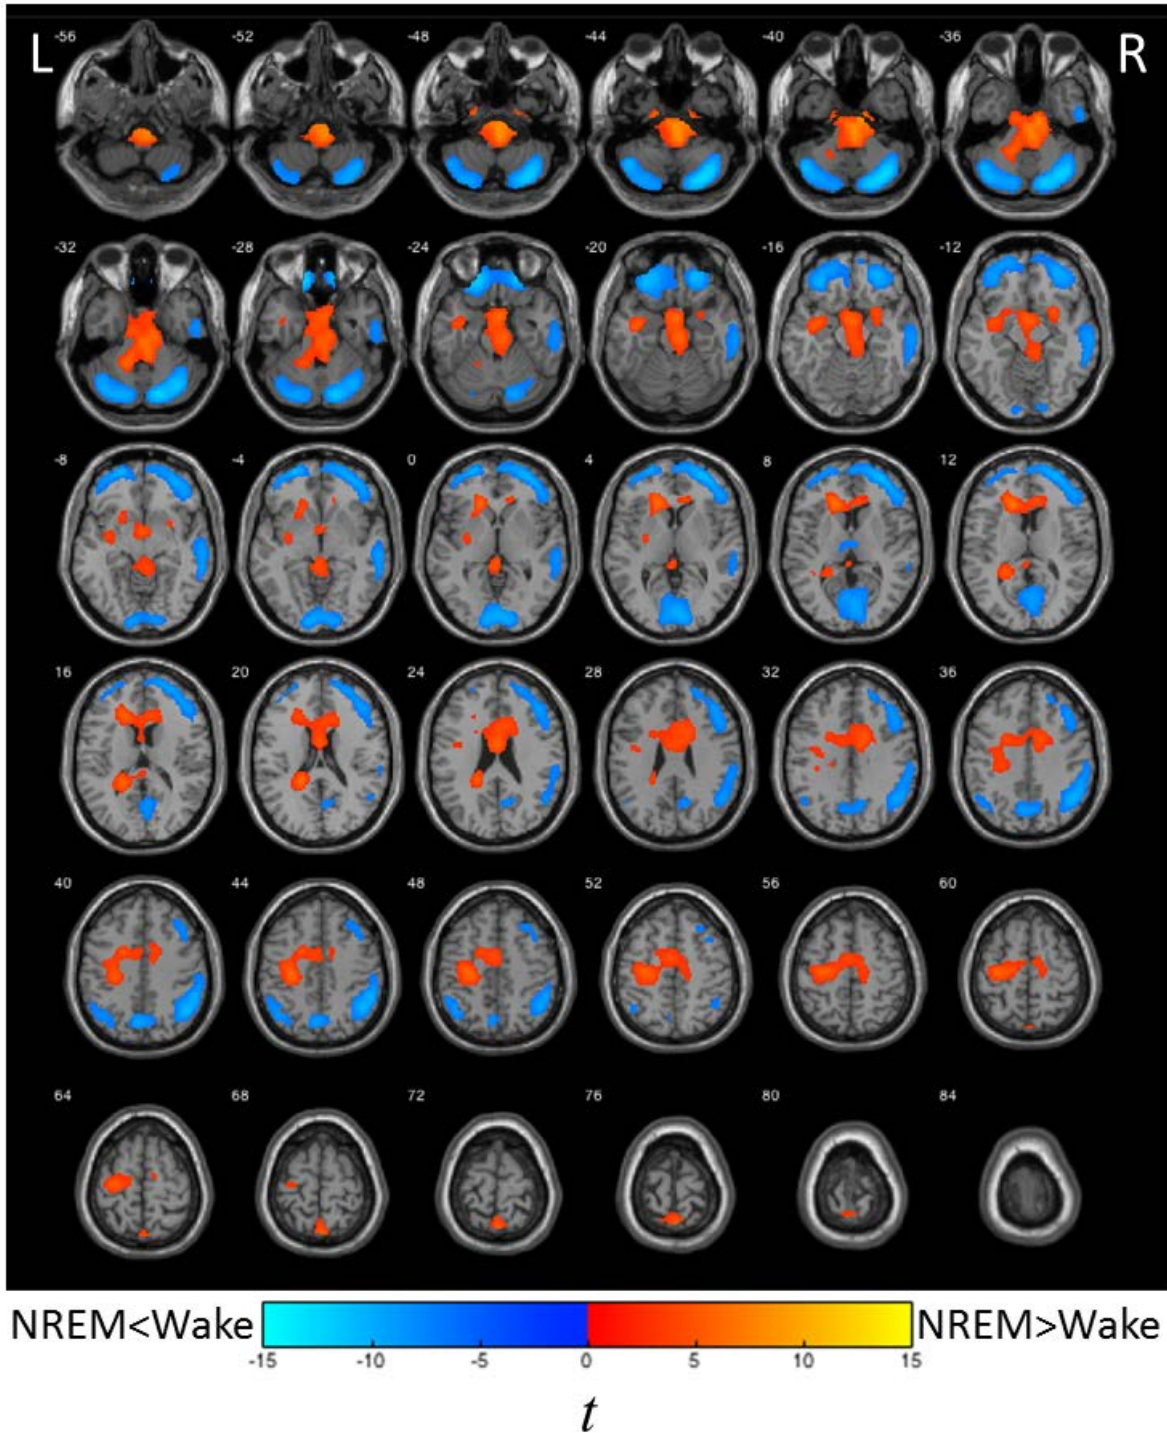

**Figure S3**—Results of the state (NREM sleep-wake), independent of group, analysis (Figure 3 and Table 5) for relative regional cerebral metabolic rate for glucose ( $rCMR_{glc}$ ) mapped onto a

high-resolution MRI. The left and right hemispheres of the brain are indicated with L and R, respectively. The color bar represents  $t$  values; blue indicates regions where  $rCMR_{glc}$  was relatively lower during NREM sleep than wake, and orange indicates regions where it was relatively higher during NREM sleep than wake.

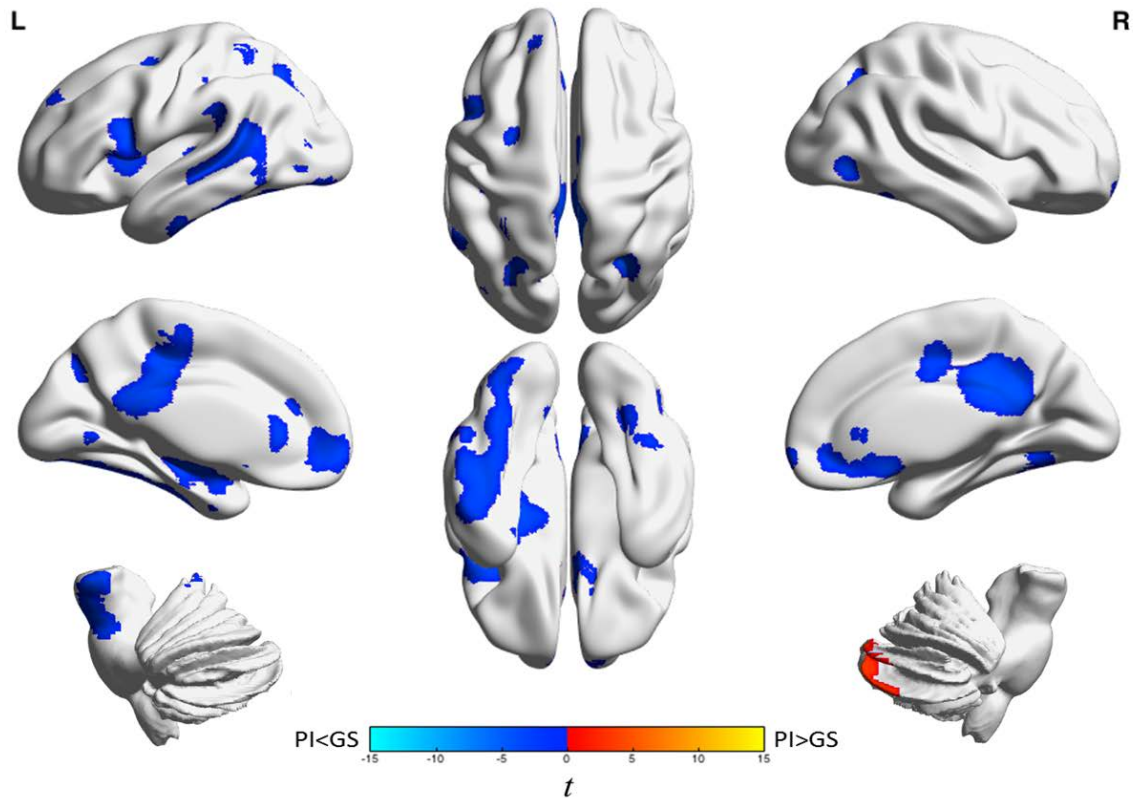

**Figure S4—Group Differences in Relative Glucose Metabolism during Wake.** We assessed relative regional cerebral metabolic rate for glucose ( $rCMR_{glc}$ ) in a sample of 44 patients with primary insomnia (PI) and 40 good sleeper controls (GS) during morning wakefulness. PI had lower relative  $rCMR_{glc}$  in 4 clusters spanning the neocortex and brainstem. PI also had higher relative  $rCMR_{glc}$  than GS in the right cerebellum. All clusters were significant at  $P_{3DC\_corrected} < 0.05$ . A full list of brain regions involving these clusters is presented in Table S1. The color bar represents  $t$  values; blue indicates regions where PI had lower relative  $rCMR_{glc}$  than GS and orange indicates regions where PI had higher relative  $rCMR_{glc}$  than GS during wakefulness.



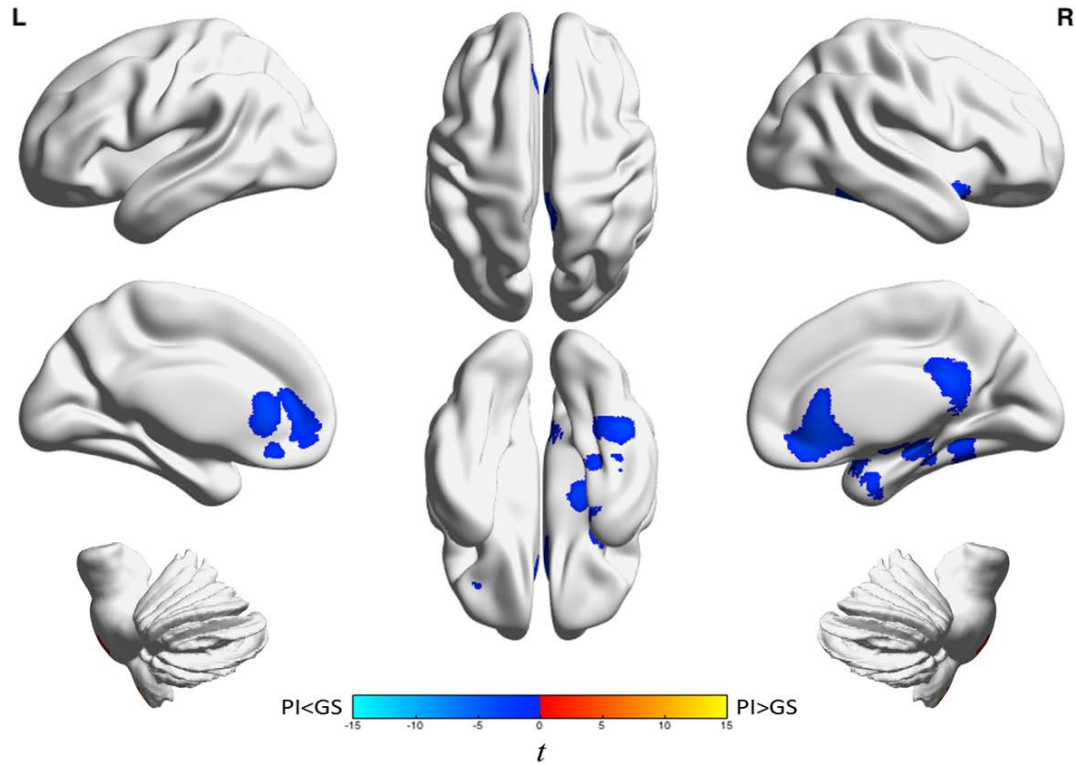

**Figure S5—Group Differences in Relative Glucose Metabolism during NREM Sleep.** We assessed relative regional cerebral metabolic rate for glucose ( $rCMR_{glc}$ ) in a sample of 44 patients with primary insomnia (PI) and 40 good sleeper controls (GS) during NREM sleep. Patients with PI had lower relative  $rCMR_{glc}$  in three clusters centered on the anterior cingulate, right medial temporal lobe, and right precuneus/posterior cingulate,  $P_{3DC\_corrected} < 0.05$  for all clusters. A full list of brain regions involving these clusters is presented in Table S1. The color bar represents  $t$  values; blue indicates regions where PI had lower relative  $rCMR_{glc}$  than GS during NREM sleep.

**Table S1—Group (GS vs. PI) differences in relative glucose metabolism during wake and NREM sleep.**

| <b>Analysis</b> | <b>Brain region</b>                                                                                                                                                              | <b><i>k</i><sup>A</sup></b> | <b><i>t</i>-statistic (max)<sup>B</sup></b> | <b><i>x</i></b> | <b><i>y</i></b> | <b><i>z</i></b> |
|-----------------|----------------------------------------------------------------------------------------------------------------------------------------------------------------------------------|-----------------------------|---------------------------------------------|-----------------|-----------------|-----------------|
| Wake            | Left frontal cortex and anterior cingulate gyrus                                                                                                                                 | 1439                        | -4.0                                        | -18             | 38              | -4              |
|                 | Left inferior frontal gyrus and left insula                                                                                                                                      | 947                         | -44                                         | -44             | 14              | 14              |
|                 | Right medial frontal gyrus, anterior cingulate, frontal-orbital gyrus, superior frontal gyrus, and caudate                                                                       | 1128                        | -4.7                                        | 14              | 28              | -10             |
| NREM            | Temporal lobe, parietal lobe, precuneus, middle and posterior cingulate gyri, frontal lobe, occipital lobe, left hippocampus, putamen, insula, left brainstem, and left amygdala | 11925                       | -5.4                                        | 26              | -60             | -36             |
|                 | Right cerebellum                                                                                                                                                                 | 729                         | 3.8                                         | 16              | -88             | -32             |
|                 | Anterior cingulate, medial frontal gyrus, orbitofrontal cortex, inferior frontal gyrus, and right caudate                                                                        | 2335                        | -4.6                                        | 14              | 30              | -10             |
|                 | Right posterior cingulate, bilateral precuneus, and                                                                                                                              | 1100                        | -5.3                                        | 12              | -40             | 20              |



middle cingulum

Right fusiform gyrus, parahippocampus, superior            2076            -5.1            38            2            -24

and inferior temporal gyri, hippocampus, and

amygdala

---

Note. <sup>A</sup>Cluster sizes ( $k$ ) greater than 670 voxels for wake and 708 voxels for NREM sleep were significant at height threshold

$p_{uncorrected} > 0.005$  and cluster threshold  $P_{3DC\_corrected} < 0.05$ . <sup>B</sup>Negative  $t$ -statistics indicate regions where PI had lower relative  $rCMR_{glc}$

than GS; positive  $t$ -statistics indicate regions where PI had higher relative  $rCMR_{glc}$  than GS.

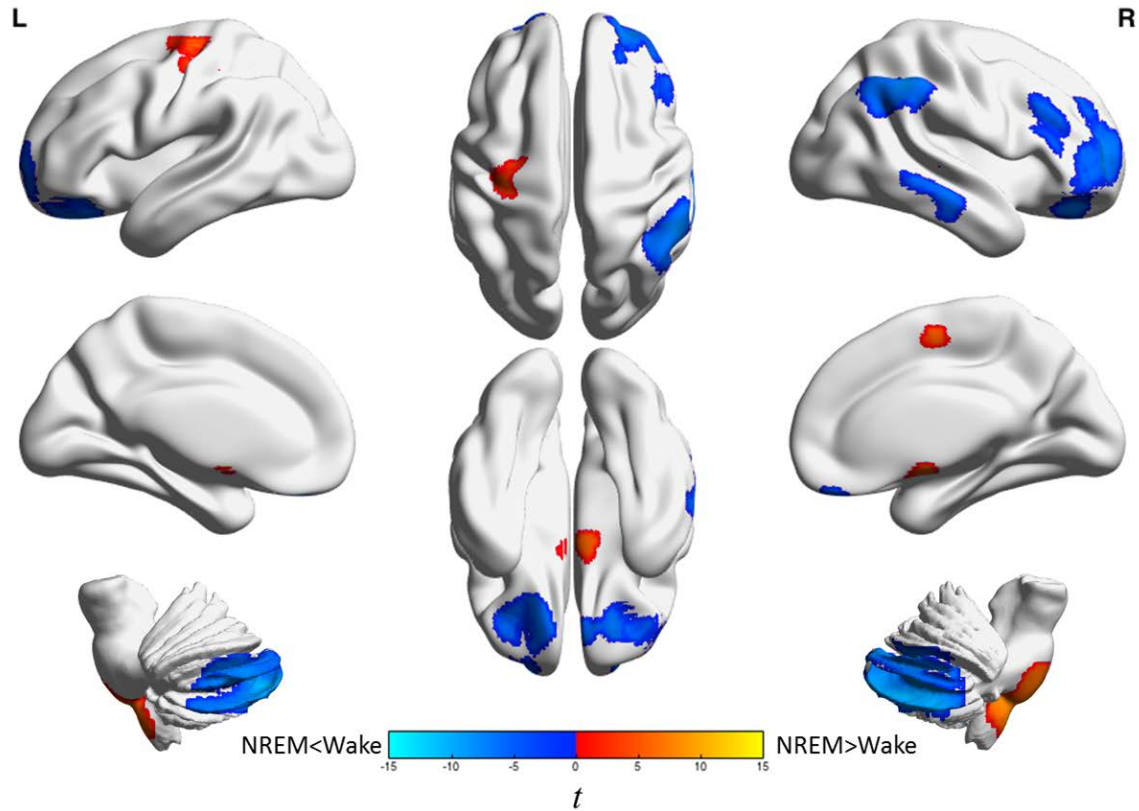

**Figure S6—Sleep-Wake Differences in Relative Glucose Metabolism in Patients with Primary Insomnia.** We compared relative regional cerebral metabolic rate for glucose ( $rCMR_{glc}$ ) during NREM sleep to that during wake in a sample of 44 patients with primary insomnia. The color bar represents  $t$  values; blue indicates regions where  $rCMR_{glc}$  was relatively lower during NREM sleep than wake, and orange indicates regions where  $rCMR_{glc}$  was relatively higher during NREM sleep than during wake. All clusters were significant at  $P_{FWE\_corrected} < 0.05$ . A full list of regions associated with these significant clusters is presented in Table S2.

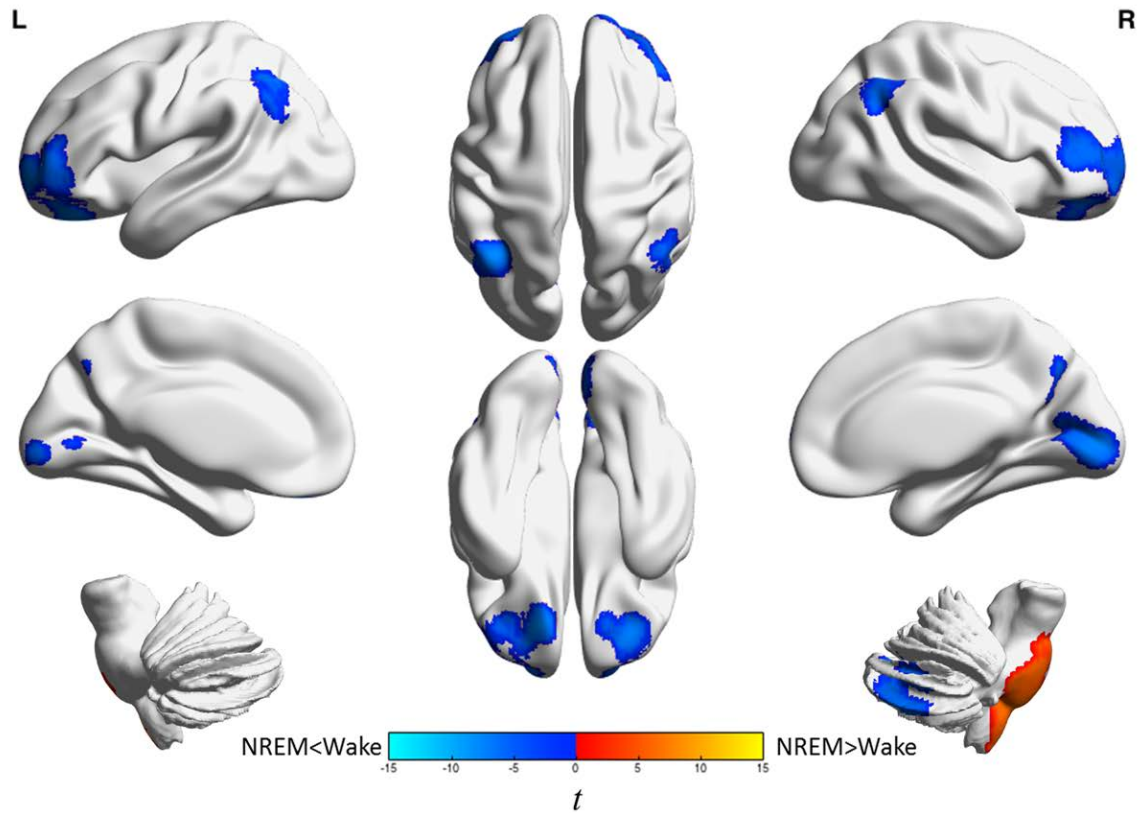

**Figure S7—Sleep-Wake Differences in Relative Glucose Metabolism in Good Sleepers.** We compared relative regional cerebral metabolic rate for glucose ( $rCMR_{glc}$ ) during NREM sleep to that during wake in a sample of 40 good sleeper controls. The color bar represents  $t$  values; blue indicates regions where  $rCMR_{glc}$  was relatively lower during NREM sleep than wake, and orange indicates regions where  $rCMR_{glc}$  was relatively higher during NREM sleep than during wake. All clusters were significant at  $P_{FWE\_corrected} < 0.05$ . A full list of regions associated with these significant clusters is presented in Table S2.

**Table S2—Sleep-wake differences in relative regional cerebral metabolic rate for glucose (rCMRglc) in patients with primary insomnia (PI) and good sleeper controls (GS).**

| Analysis                        | Brain region                                                                                           | $k^A$ | $t$ -statistic     |     |     |     |
|---------------------------------|--------------------------------------------------------------------------------------------------------|-------|--------------------|-----|-----|-----|
|                                 |                                                                                                        |       | (max) <sup>B</sup> | $x$ | $y$ | $z$ |
| PI                              | Left orbitofrontal cortex and anterior aspects of the left superior, middle, and inferior frontal gyri | 61    | -8.9               | -28 | 36  | -22 |
|                                 | Right frontal cortex                                                                                   | 13    | -7.8               | 34  | 54  | 0   |
|                                 |                                                                                                        | 17    |                    |     |     |     |
|                                 | Left medial frontal gyrus and left supplemental motor area                                             | 24    | 7.1                | 0   | -4  | 52  |
|                                 |                                                                                                        | 3     |                    |     |     |     |
|                                 | Left precentral and postcentral gyri                                                                   | 12    | 8.9                | -30 | -20 | 46  |
|                                 |                                                                                                        | 73    |                    |     |     |     |
|                                 | Right inferior parietal lobe                                                                           | 90    | -8.4               | 54  | -44 | 42  |
|                                 |                                                                                                        | 8     |                    |     |     |     |
|                                 | Right middle temporal gyrus                                                                            | 34    | -6.6               | 64  | -24 | -10 |
|                                 |                                                                                                        | 7     |                    |     |     |     |
|                                 | Left putamen                                                                                           | 40    | 7.1                | -32 | -8  | -2  |
|                                 |                                                                                                        | 1     |                    |     |     |     |
| Subgenual area and hypothalamus | 61                                                                                                     | 7.1   | 4                  | 2   | -18 |     |
|                                 | 4                                                                                                      |       |                    |     |     |     |
| Brainstem                       | 14                                                                                                     | 10.2  | 4                  | -32 | -44 |     |
|                                 | 98                                                                                                     |       |                    |     |     |     |

|    |                                                                                   |    |       |     |     |     |
|----|-----------------------------------------------------------------------------------|----|-------|-----|-----|-----|
|    | Left cerebellum                                                                   | 20 | -11.0 | -16 | -82 | -40 |
|    |                                                                                   | 08 |       |     |     |     |
|    | Right cerebellum                                                                  | 27 | -10.7 | 30  | -74 | -42 |
|    |                                                                                   | 49 |       |     |     |     |
| GS | Left frontal cortex                                                               | 97 | -8.4  | -16 | -38 | -28 |
|    |                                                                                   | 8  |       |     |     |     |
|    | Right frontal cortex                                                              | 91 | -7.4  | 28  | 46  | -14 |
|    |                                                                                   | 0  |       |     |     |     |
|    | Left inferior parietal lobule                                                     | 45 | -8.3  | -40 | -56 | 48  |
|    |                                                                                   | 3  |       |     |     |     |
|    | Right inferior parietal lobule                                                    | 23 | -6.8  | 46  | -58 | 40  |
|    |                                                                                   | 2  |       |     |     |     |
|    | Bilateral cuneus, precuneus, calcarine,<br>lingual gyrus, and posterior cingulate | 13 | -7.6  | 10  | -90 | 4   |
|    |                                                                                   | 14 |       |     |     |     |
|    | Brainstem                                                                         | 18 | 8.0   | 8   | -16 | -46 |
|    |                                                                                   | 79 |       |     |     |     |
|    | Right cerebellum                                                                  | 78 | -7.1  | 16  | -78 | -32 |
|    |                                                                                   | 2  |       |     |     |     |

---

Note. <sup>A</sup>Cluster sizes ( $k$ ) greater than 200 voxels were significant at height threshold  $P_{\text{FWE\_corrected}}$

$< 0.05$ . <sup>B</sup>Negative  $t$ -statistics indicate regions where  $\text{rCMR}_{\text{glc}}$  was relatively lower during NREM sleep than wake; positive  $t$ -statistics indicate regions where  $\text{rCMR}_{\text{glc}}$  was relatively higher during NREM sleep than during wake.
